# Supplementary material
Source: HighWire-hosted journal article supplement (https://jnm.snmjournals.org/highwire/filestream/99804/field_highwire_adjunct_files/0/245530_Supplemental_Data.pdf)
Supplement: 245530_Supplemental_Data.pdf [file 245530_Supplemental_Data.pdf]

## Supplemental Table 1

|                           | Average - Baseline | Average - After PHC-102 SPECT/CT | Reference values | Units  |
|---------------------------|--------------------|----------------------------------|------------------|--------|
| <b>Blood Count</b>        |                    |                                  |                  |        |
| Erythrocytes              | 4.1                | 3.9                              | 4.4 - 5.8        | T/L    |
| Hemoglobin                | 11.8               | 11.2                             | 13.5 - 18.0      | g/dL   |
| Hematocrit                | 34.5               | 32.7                             | 40.0 - 52.0      | %      |
| MCV                       | 84.6               | 84.2                             | 78.0 - 98.0      | fL     |
| MCH                       | 28.9               | 28.8                             | 27.0 - 33.0      | pg     |
| MCHC                      | 34.2               | 34.2                             | 30.0 - 36.0      | g/dL   |
| Erythrocytes (Fraction)   | 14.0               | 13.8                             | 11.0 - 16.0      | %      |
| Platelets                 | 202.8              | 226.4                            | 150 - 350        | G/L    |
| Mean Platelets Volume     | 11.3               | 11.1                             | 7.0 - 13.0       | fL     |
| Leukocytes                | 7.6                | 8.9                              | 4.0 - 10.0       | G/L    |
| <b>Differential Count</b> |                    |                                  |                  |        |
| Neutrophils (absolut)     | 4.0                | 6.2                              | 2.0 - 7.5        | G/L    |
| Neutrophils (relative)    | 61.2               | 71.1                             | 50.0 - 75.0      | %      |
| Lymphocytes (absolut)     | 1.7                | 1.4                              | 1.0 - 4.0        | G/L    |
| Lymphocytes (relative)    | 26.8               | 16.9                             | 25.0 - 40.0      | %      |
| Monocytes (absolut)       | 0.6                | 0.8                              | 0.0 - 1.2        | G/L    |
| Monocytes (relative)      | 8.2                | 9.0                              | 0.0 - 12.0       | %      |
| Eosinophils (absolut)     | 0.2                | 0.2                              | 0.0 - 0.4        | G/L    |
| Eosinophils (relative)    | 3.3                | 2.6                              | 0.0 - 4.0        | %      |
| Basophils (absolut)       | 0.0                | 0.0                              | 0.0 - 0.1        | G/L    |
| Basophils (relative)      | 0.5                | 0.5                              | 0.0 - 1.0        | %      |
| aPTT                      | 39.1               | 36.1                             | 27.0 - 41.0      | s      |
| Fibrinogen - Clauss       | 488.0              | 391.0                            | 200 - 400        | mg/dL  |
| <b>Clinical Chemistry</b> |                    |                                  |                  |        |
| Sodium                    | 140.3              | 137.7                            | 136 - 145        | mmol/L |
| Potassium                 | 4.7                | 4.4                              | 3.5 - 5.1        | mmol/L |
| Chloride                  | 99.6               | 99.0                             | 98 - 107         | mmol/L |
| Calcium                   | 6.3                | 2.2                              | 2.20 - 2.55      | mmol/L |
| Inorganic Phosphate       | 1.2                | 1.2                              | 0.81 - 1.45      | mmol/L |
| Magnesium                 | 1.0                | 1.1                              | 0.66 - 1.07      | mmol/L |
| Creatinine                | 0.9                | 1.0                              | 0.70 - 1.20      | mg/dL  |
| Urea                      | 15.4               | 14.9                             | 8.0 - 23.0       | mg/dL  |
| Bilirubin (total)         | 2.1                | 2.1                              | 0.0 - 1.2        | mg/dL  |
| Hemoglobin (free)         | 45.0               | 33.8                             | < 4              | mg/dL  |
| Albumin                   | 41.8               | 37.0                             | 35.0 - 52.0      | g/L    |
| ASAT (GOT)                | 41.2               | 17.3                             | < 50             | U/L    |
| ALAT (GPT)                | 38.8               | 27.8                             | < 50             | U/L    |
| Gamma - GT                | 59.2               | 35.8                             | < 60             | U/L    |

Laboratory parameters before and after PHC-102 SPECT/CT microdosing procedure. Overall profile was not altered by administration of PHC-102 as evident by the comparison of blood count and clinical chemistry values calculated as average of data available from the five patients imaged.

**Supplemental Table 2**

| Batch   | Purity HPLC [%] | Purity TLC [%] | Starting activity [MBq] | Activity product [MBq] | Specific activity [MBq/μg]* |
|---------|-----------------|----------------|-------------------------|------------------------|-----------------------------|
| I       | 95.2            | 99.76          | 2070                    | 1450                   | 29                          |
| II      | 99.86           | 98.88          | 1400                    | 1030                   | 20.6                        |
| III     | 95.1            | 99.57          | 1150                    | 954                    | 19.08                       |
| IV      | 94.5            | 97.08          | 1570                    | 1299                   | 25.98                       |
| V       | 93.7            | 100            | 1950                    | 1132                   | 22.64                       |
| Average | 95.672          | 99.058         | 1628                    | 1173                   | 23.46                       |

Radiochemical incorporation and specific activity prior dilution of each different PHC-102 batch (each different batch corresponds to material prepared for each different patient imaged with PHC-102 SPECT/CT procedure). The product solution was diluted with a cold PHC-101 solution to obtain a final activity of 800 MBq/50μg.

### Supplemental Table 3

| Target Organ     | ICRP-103 ED - Patient 1 | ICRP-103 ED - Patient 2 | ICRP-103 ED - Patient 3 | ICRP-103 ED - Patient 4 | ICRP-103 ED - Patient 5 |
|------------------|-------------------------|-------------------------|-------------------------|-------------------------|-------------------------|
| Brain            | 2.50E-02                | 1.17E-08                | 1.76E-02                | 5.96E-03                | 1.21E-04                |
| Gallbladder Wall | 9.00E-02                | 4.85E-01                | 3.32E-02                | 3.33E-02                | 1.20E-02                |
| Small Intestine  | 4.46E-01                | 1.02E-01                | 1.53E-01                | 1.01E-01                | 1.22E-02                |
| Stomach Wall     | 5.93E+00                | 8.49E+02                | 7.16E+00                | 4.49E+00                | 4.23E+00                |
| Kidneys          | 2.81E-01                | 1.22E+00                | 3.54E-01                | 2.63E-01                | 2.23E-01                |
| Liver            | 5.49E-01                | 6.45E+00                | 6.03E+00                | 2.15E-01                | 7.03E-02                |
| Lung             | 5.58E-01                | 2.69E+01                | 3.78E-01                | 2.97E-01                | 1.79E-01                |
| Salivary Glands  | 2.72E-02                | 8.68E-02                | 5.66E-02                | 7.40E-03                | 3.75E-04                |
| Spleen           | 8.74E-02                | 4.89E+00                | 6.09E-02                | 5.32E-01                | 4.14E-02                |

Total absorbed dose (mSv) to each organ after presented for each individual patient imaged with PHC-102 SPECT/CT procedure. Calculations are based on data at the three time points studies (30 min, 2 hours and 6 hours after intravenous administration of PHC-102).
